# Supplementary material for: Social Well-Being at School: Development and Validation of a Scale for Primary Education Students
Source: Frontiers journal article supplement (doi:10.3389/feduc.2021.800248), 2021-12-07
Supplement: Table_1.DOCX [file Table_1.DOCX]

**Supplemental file: Students’ social wellbeing at school scale**

**STUDENTS’ SOCIAL WELLBEING AT SCHOOL SCALE**

| DATE OF BIRTH |  |
| --- | --- |
| GRADE |  |
| GENDER |  |
| SCHOOL |  |
| STUDENT ID |  |

INSTRUCTIONS

Carefully read the following sentences on your class and your school. Mark each sentence to show your degree of agreement with the smiley faces below.

| **1** | **2** | **3** | **4** | **5** |
| --- | --- | --- | --- | --- |
| **Completely disagree** | **Disagree** | **I don’t know/ I don’t care** | **Agree** | **Completely agree** |
| 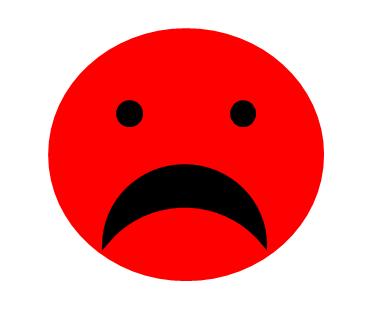 | 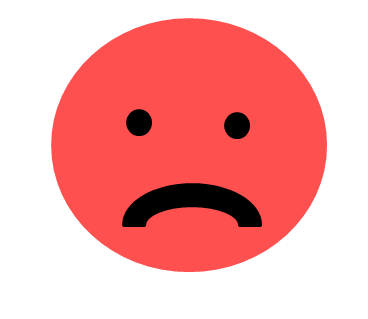 | 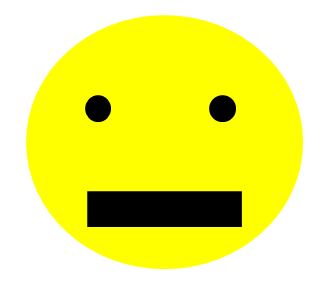 | 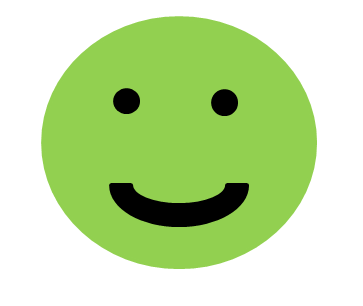 | 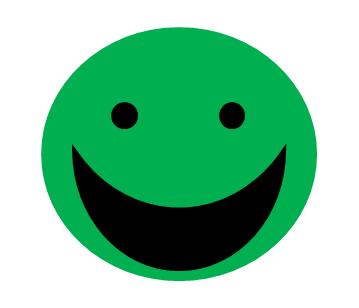 |

This questionnaire is absolutely personal, there are no right or wrong answers, so please be totally honest in your answers.

Thank you very much for your participation!

| *During group projects…* | | |
| --- | --- | --- |
| 1. I like to be on a team with classmates that are different from me (physically, from another country, different grades than mine, etc.). | |  |
| 2. I have the opportunity to learn more about my classmates. | |  |
| 3. I like to help my classmates when they have a problem. | |  |
| 4. When I need it, I ask my classmates for help. | |  |
| 5. We have to support each other to make tasks easier to do. | |  |
| 6. It is important to take other people’s opinions into account. | |  |
| 7. I can change my mind if I talk to my classmates and they give me good reasons to think differently about something. | |  |
| 8. When making a decision, all the members of the group must participate. | |  |
| 9. I feel responsible for what I and the rest of my classmates learn. | |  |
| 10. We must discuss and assess whether we have achieved the goals we set for ourselves. | |  |
| 11. When we work in a group the results (grades, final projects, etc) are better than when we work individually. | |  |
| During class… | | |
| 12. I like to share my school supplies with my classmates. | |  |
| 13. My classmates lend me their things. | |  |
| 14. I think we are very close in my class. | |  |
| 15. My classmates value me. | |  |
| 16. I do not like it when my classmates fight in class. | |  |
| 17. I have a great time in class. | |  |
| About my school… | | |
| 18. I like to go to school. | |  |
| 19. I get along with almost all the children. | |  |
| 20. Friendships at school are very important to me. | |  |
| 21. I would not like to be moved to another school | |  |
| 22. I think my school is a safe place for me. | |  |
| 23. In my school, children usually respect the rules. | |  |
| 24. When I see an unfair situation that may harm someone, I have to notify an adult so they can help the person who may harmed | |  |
| 25. I have to help anyone regardless of their background, the way they are, their physical appearance, etc. | |  |
| **Be careful! From now on, instead of using the smiley faces above, using the following scale**   1. **Always 2- Most of the time 3 – Sometimes 4 – Once or twice 5 - Never** | | |
| Have you left out a schoolmate for any of these reasons? | | |
| 26. Being or looking like they’re from another country or belonging to a certain religion |  | |
| 27. Being taller, shorter, fatter or thinner than others |  | |
| 28. Being uglier or better-looking than others |  | |
| 29. Having a disability |  | |
| 30. Having little money |  | |
| 31. Being a boy who behaves like a girl |  | |
| 32. Being a girl who behaves like a boy |  | |
| 33. Because he/she is not interested in the same things as me |  | |
| 34. Because he/she does not speak the same language as me |  | |
| 35. Because he/she gets bad or very good grades |  | |
| 36. Because he/she does not behave well with others |  | |
| 37. Because he/she messes with other people |  | |
| 38. Because he/she misbehaves in class |  | |

Thank you very much for your answers!


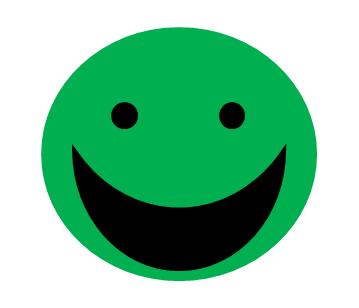


*Notes for researchers and practitioners

Items 1 to 8 belong to Factor 1 – cooperation

Items 12, 13, 24 and 25 belong to Factor 2 - solidarity

Items 14, 15 and 21 belong to Factor 3 – cohesion

Items 16, 19, 20, 22 and 23 belong to Factor 4 – coexistence

Items 17 and 18 belong to Factor 5 – attitude towards school

Items 26 to 38 belong to Factor 6 – attitude towards diversity

Items 9 to 11 belong to Factor 7 – achievement
